# Direct Association of Unfolded Proteins with Mammalian ER Stress Sensor, IRE1 $\beta$

Daisuke Oikawa<sup>1,2,3\*</sup>, Akira Kitamura<sup>4</sup>, Masataka Kinjo<sup>4</sup>, Takao Iwawaki<sup>1,3,5\*</sup>

**1** Iwawaki lab, Advanced Scientific Research Leaders Development Unit, Gunma University, Maebashi, Gunma, Japan, **2** Research Fellow of the Japan Society for the Promotion of Science, Chiyoda-ku, Tokyo, Japan, **3** Iwawaki Initiative Research Unit, Advanced Science Institute, RIKEN, Wako, Saitama, Japan, **4** Laboratory of Molecular Cell Dynamics, Faculty of Advanced Life Science, Hokkaido University, Kita-ku, Sapporo, Japan, **5** PRESTO, Japan Science and Technology Agency, Kawaguchi, Saitama, Japan

## Abstract

IRE1, an ER-localized transmembrane protein, plays a central role in the unfolded protein response (UPR). IRE1 senses the accumulation of unfolded proteins in its luminal domain and transmits a signal to the cytosolic side through its kinase and RNase domains. Although the downstream pathways mediated by two mammalian IRE1s, IRE1 $\alpha$  and IRE1 $\beta$ , are well documented, their luminal events have not been fully elucidated. In particular, there have been no reports on how IRE1 $\beta$  senses the unfolded proteins. In this study, we performed a comparative analysis to clarify the luminal event mediated by the mammalian IRE1s. Confocal fluorescent microscopy using GFP-fused IRE1s revealed that IRE1 $\beta$  clustered into discrete foci upon ER stress. Also, fluorescence correlation spectroscopy (FCS) analysis in living cells indicated that the size of the IRE1 $\beta$  complex is robustly increased upon ER stress. Moreover, unlike IRE1 $\alpha$ , the luminal domain of IRE1 $\beta$  showed anti-aggregation activity *in vitro*, and IRE1 $\beta$  was coprecipitated with the model unfolded proteins in cells. Strikingly, association with BiP was drastically reduced in IRE1 $\beta$ , while IRE1 $\alpha$  was associated with BiP and dissociated upon ER stress. This is the first report indicating that, differently from IRE1 $\alpha$ , the luminal event mediated by IRE1 $\beta$  involves direct interaction with unfolded proteins rather than association/dissociation with BiP, implying an intrinsic diversity in the sensing mechanism of mammalian sensors.

**Citation:** Oikawa D, Kitamura A, Kinjo M, Iwawaki T (2012) Direct Association of Unfolded Proteins with Mammalian ER Stress Sensor, IRE1 $\beta$ . PLoS ONE 7(12): e51290. doi:10.1371/journal.pone.0051290

**Editor:** F. Gisou van der Goot, Ecole Polytechnique Federale de Lausanne, Switzerland

**Received:** September 23, 2012; **Accepted:** November 1, 2012; **Published:** December 7, 2012

**Copyright:** © 2012 Oikawa et al. This is an open-access article distributed under the terms of the Creative Commons Attribution License, which permits unrestricted use, distribution, and reproduction in any medium, provided the original author and source are credited.

**Funding:** This work was supported by grants from RIKEN, JST (Japan Science and Technology Agency) and MEXT (Ministry of Education, Culture, Sports, Science and Technology: No. 22113524, No. 24113702) to TI, and from JSPS (Japan Society for the Promotion of Science) to DO. The funders had no role in study design, data collection and analysis, decision to publish, or preparation of the manuscript.

**Competing Interests:** The authors have declared that no competing interests exist.

\* E-mail: oikawa@gunma-u.ac.jp (DO); iwawaki@gunma-u.ac.jp (TI)

## Introduction

The endoplasmic reticulum (ER) is responsible for the structural maturation of proteins entering the secretory pathway. To ensure the fidelity of protein folding and maturation, cells turn on a network of signaling pathways, collectively termed the unfolded protein response (UPR) [1]. Protein folding is monitored by three distinct sensors: inositol-requiring enzyme 1 (IRE1) [2–3]; protein kinase RNA (PKR)-like ER kinase (PERK) [4]; and activating transcription factor 6 (ATF6) [5]. IRE1 is a conserved transmembrane protein that has an ER luminal sensor domain and cytosolic kinase and ribonuclease domains. The luminal domain of IRE1 senses the accumulation of unfolded proteins and then the activated ribonuclease domain cleaves specific exon-intron sites in the mRNA encoding the transcription factor XBP1 (X-box binding protein 1) [6–7]. This cleavage initiates an unconventional splicing reaction, leading to the production of active XBP1 and induction of various adaptive genes [8].

The mechanism explaining how IRE1 senses the unfolded proteins is best understood in yeast. A series of studies identified the two-step sensing mechanism of yeast Ire1, consisting of a BiP-deprivation step and a direct association step. Under normal conditions, ER chaperone BiP is associated with Ire1. Under stressed conditions, excess unfolded proteins deprive Ire1 of BiP,

and the resulting BiP-free Ire1 forms homomeric associations (Step 1) [9–12]. Then the homomeric Ire1 associates directly with unfolded proteins, which may elicit conformational change in the luminal domain, leading to the reorientation of the cytosolic domain and possible autophosphorylation of the kinase domain (Step 2) [13–14]. Moreover, recent studies indicate that the activated Ire1 clusters into discrete foci and forms dot-like assemblies [14–15]. Since the target RNA of yeast Ire1, Hac1 mRNA, is co-localized with these foci in cells, the high-ordered assemblies are believed to provide a concentrated, specialized molecular microenvironment, which could attract low-affinity binders with high avidity [16].

Similar to the yeast Ire1, mammalian IRE1 $\alpha$  also senses the unfolded proteins via BiP dissociation and following homomeric association [17–20]. However, the mechanism is different from that of yeast Ire1. Compared to yeast Ire1 activation, which is dually regulated by BiP deprivation and direct association with unfolded proteins, the activation of mammalian IRE1 $\alpha$  is mainly regulated by the BiP deprivation step [21]. It was recently reported that mammalian IRE1 $\alpha$  also forms high-ordered assemblies upon ER stress [22].

In mammals, there are two IRE1 paralogues, IRE1 $\alpha$  and IRE1 $\beta$  [23–25]. The major difference is their expression pattern. While IRE1 $\alpha$  is expressed ubiquitously, the expression of IRE1 $\beta$  is

restricted to the epithelium of the gastrointestinal tract [26]. Also, there is considerable divergence in their downstream events. Contrary to the survival effect mediated by IRE1 $\alpha$  [27], IRE1 $\beta$  is involved in apoptotic cell death [25]. One reason behind this would be the diverse characteristics in the cytosolic domain, and the completely different targets: IRE1 $\alpha$  cleaves XBP1 or insulin mRNA [28–30], while IRE1 $\beta$  targets ribosomal RNA [25] [31] or MTP mRNA [32].

Thus, even though the downstream effects mediated by the cytosolic domains of the two mammalian IRE1s have been extensively studied, their luminal events, especially in IRE1 $\beta$ , have not been elucidated. In this study, we performed a comparative analysis using the two mammalian IRE1s to clarify the luminal event mediated by IRE1 $\beta$ .

## Materials and Methods

### Plasmids

pTKbasal-hIRE1 $\alpha$ -mEGFP-Flag (wild type, D123P, or K599A mutants) or pTKbasal-hIRE1 $\beta$ -mEGFP-Flag (wild type or K547A mutant) were used for the expression of GFP-fused human IRE1s. To make these plasmids, the PCR-amplified monomeric GFP (mEGFP) fragment, which contains A206K substitution, with 1x Flag tag was ligated into pTKbasal [21] using *Bam*HI/*Nhe*I sites. Then, the PCR-amplified human IRE1 $\alpha$  fragment (stop codon removed) or human IRE1 $\beta$  fragment (stop codon removed) was inserted using *Hind*III/*Xho*I or *Hind*III/*Bam*HI sites, respectively. Mutations were introduced by PCR techniques. pCAG-hIRE1 $\alpha$ -HA (wild type or K599A mutant) and pCAG-hIRE1 $\beta$ -HA (wild type or K547A mutant) were used for overexpression of 3x HA-tagged IRE1s [25]. For the overexpression of mouse *Amy1*, pCAX-m*Amy1*-Flag was used. To make this plasmid, PCR-amplified *Amy1* fragment containing 3x Flag-tag was ligated into pCAX using *Hind*III/*Xho*I sites. For the overexpression of TCR $\alpha$ -GFP, pCAX-TCR $\alpha$ -GFP-Flag was used. To make this plasmid, PCR-amplified TCR $\alpha$ -GFP fragment containing 3x Flag-tag was ligated into pCAX using *Kpn*I/*Nhe*I sites. For bacterial expression of MBP-fused luminal fragments, pMAL-CSSR-His (for yeast Ire1) [33], pMAL-hIRE1 $\alpha$ LD-His (for human IRE1 $\alpha$ ), and pMAL-hIRE1 $\beta$ LD-His (for human IRE1 $\beta$ ) were used. To make pMAL-hIRE1 $\alpha$ LD-His, PCR-amplified fragment encoding aa 31–443 of human IRE1 $\alpha$  and 8x His-tag was digested using *Bgl*II/*Xho*I and ligated into *Bam*HI/*Sal*I-digested pMAL-c2x (NEB). To make pMAL-hIRE1 $\beta$ LD-His, PCR-amplified fragment encoding aa 35–432 of human IRE1 $\beta$  and 8x His-tag was ligated into *Bam*HI/*Sal*I-digested pMAL-c2x (NEB). As a XBP1-Luc reporter, modified ERAI reporter (pCAX-HA-2xXBP1DDBD(anATG)-LUC-F) [34] was used to detect the activation of IRE1 $\alpha$  pathway. As an ATF4-Luc reporter, UMAI reporter (pCAX-mATF4(1–275)-Luc-F or pCAX-hATF4(1–285)-Luc-F) were used to detect the activation of PERK pathway. This is the gene for fusion with the upstream mRNA region (from the intrinsic first Met) of the mouse or human ATF4, and luciferase (GL3; Promega) [35]. To express the ER-localized luciferase, pTKX-ER-GL4 was used in Figure S1B [36].

### Cell Culture, Transfection, and Treatment

HeLa cells and HEK293T cells were cultured at 37°C in DMEM supplemented with 100 U/ml penicillin, 100  $\mu$ g/ml streptomycin, and 10% fetal bovine serum, in an atmosphere containing 5% CO<sub>2</sub>. Effectene<sup>®</sup> Reagent (QIAGEN) was used to introduce plasmid DNA into HeLa cells, and the calcium-phosphate-DNA precipitation method was used for HEK293T cells. To induce ER stress, cells were treated with tunicamycin

(2.5  $\mu$ g/ml) or thapsigargin (1  $\mu$ M). The assays with IRE1 $\alpha$ –/– MEFs (Fig. S1A) were performed as described previously [21].

### Live Cell Imaging

Before imaging, cells were washed twice with HBSS, and replaced in phenol red-free DMEM (Invitrogen) supplemented with 25 mM Hepes-NaOH (pH 7.4) and 10% FBS. Images were collected by LSM 510 META confocal microscope equipped with a C-Apochromat 40x/1.2NA UV-VIS-IR Korr. water immersion objective lens (Carl Zeiss).

### FCS Measurements

FCS measurements were performed with a ConfoCor 2 system and C-Apochromat 40x/1.2NA UV-VIS-IR Korr water immersion objective lens (Carl Zeiss) [37]. GFPs were excited at 488 nm. Confocal pinhole diameters were adjusted to 70 nm. Emission signals were detected with a 505 nm long-pass filter, and measured at 37°C in 5% CO<sub>2</sub>, 95% air-humidified atmosphere. The fluorescence autocorrelation function,  $G(\tau)$ , from which the average residence time ( $\tau$ ) and the absolute number of fluorescent proteins in the detection volume are calculated, was obtained as follows:

$$G(\tau) = \frac{\langle I(t)^5 \cdot I(t+\tau) \rangle}{\langle I(t) \rangle^2}$$

where  $I(t+\tau)$  is the fluorescence intensity obtained by the single photon counting method in a detection volume at a delay time  $\tau$  (brackets denote ensemble averages). Curve fitting for the multi-component model is given by:

$$G(\tau) = 1 + \frac{1}{N} \left[ \sum_i F_i \left( 1 + \frac{\tau}{\tau_i} \right)^{-1} \left( 1 + \frac{\tau}{s^2 \tau_i} \right)^{-\frac{1}{2}} + \frac{T}{1-T} \exp\left(-\frac{\tau}{\tau_i}\right) \right]$$

where  $F_i$  and  $\tau_i$  are the fraction and diffusion time of component  $i$ , respectively;  $N$  is the average number of fluorescent molecules in the detection volume defined by the beam waist  $w_0$  and the axial radius  $z_0$ ;  $s$  is the structural parameter representing the ratio of  $w_0$  and  $z_0$ ;  $T$  is the triplet fraction and  $\tau_i$  is the relaxation time of the triplet state. In living cell analysis, a two-component model was used for the determination of diffusion time.  $G(\tau)$ s in living cells were measured for 30 s. The relationships between diffusion time and structural parameters were determined using a 10<sup>−7</sup> M Rhodamine 6G (Rh6G) solution as a standard before measurement. The values of structural parameters were 4.5–6.0.

### Recombinant Protein Technique

Expression and purification of recombinant proteins were performed as described previously [14] [21] [33]. Escherichia coli strain BL21 CodonPlus<sup>TM</sup> (DE3)–RIL (Stratagene) was used for the expression of each protein. Each MBP-fused protein was induced by 0.3 mM IPTG for 1 h at 37°C, and purified by Ni-NTA (QIAGEN). Each purified protein was subjected to SDS-PAGE (8% polyacrylamide) and CBB staining.

Anti-aggregation assays using purified recombinant proteins were performed as described in our previous reports [14] [21]. Citrate synthase (Roche) or luciferase (Promega) was dissolved at 70  $\mu$ M in 20 mM HEPES (pH 7.2), 50 mM KCl, 2 mM MgCl<sub>2</sub>, 6 M Gdn-HCl. After denaturation for 1 h at room temperature, samples were diluted out of the denaturant to 1.5  $\mu$ M in the case

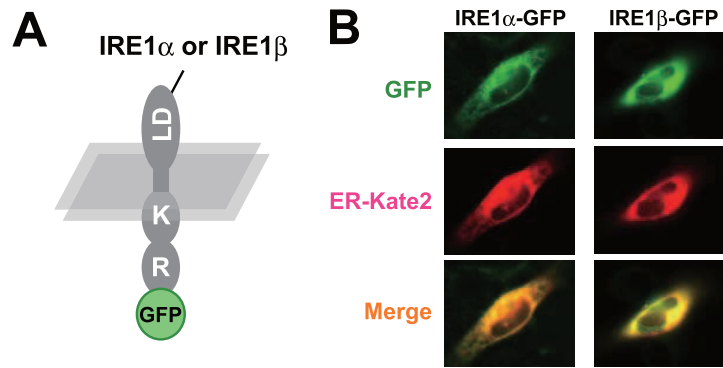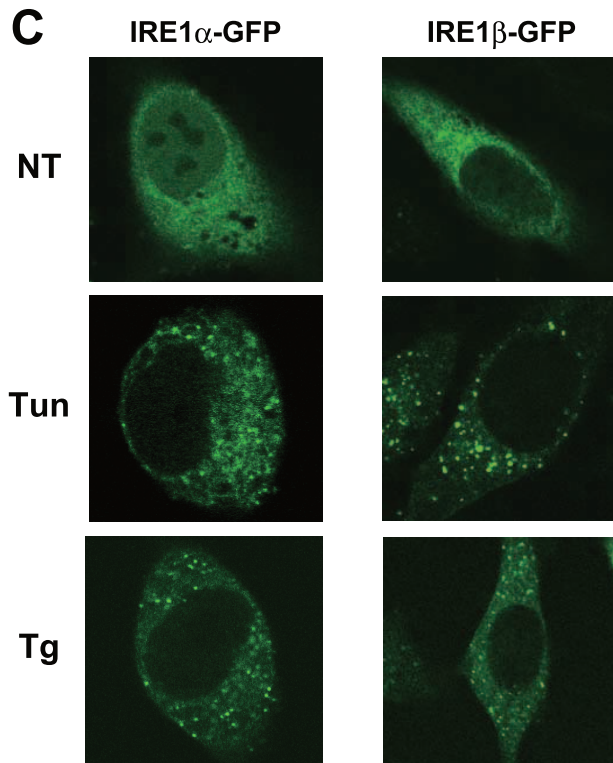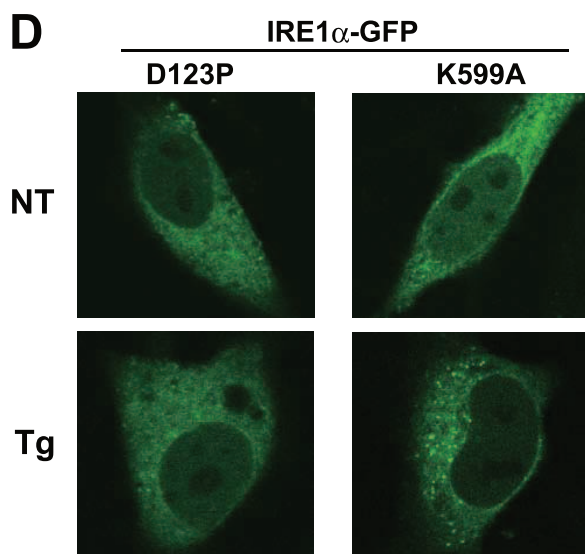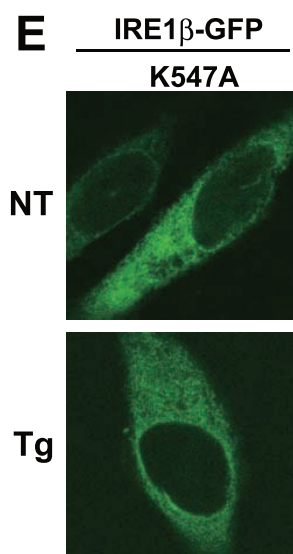

**Figure 1. Clustering of IRE1 $\alpha$  and IRE1 $\beta$  upon ER stress.** (A) Schematic of IRE1-GFP imaging construct. Luminal domain ("LD"), kinase domain ("K"), RNase domain ("R") of human IRE1s, and fused monomer-GFP are indicated. (B) ER-localization of GFP-fused IRE1s. Fluorescent images were collected from GFP-fused IRE1s and ER-mKate2 construct – transfected HeLa cells. (C) Clustering of IRE1 $\alpha$  and IRE1 $\beta$  upon ER stress. GFP-fused IRE1s were transfected into HeLa cells and treated with or without tunicamycin (2.5  $\mu$ g/ml for 2 h) or thapsigargin (1  $\mu$ M for 2 h), after which fluorescent images were collected. (D, E) Clustering defect in mutant IRE1s. GFP-fused IRE1 $\alpha$  (D123P or K599A) (D) or GFP-fused IRE1 $\beta$  (K547A) (E) were transfected into HeLa cells and treated with or without thapsigargin (1  $\mu$ M for 2 h), after which fluorescent images were collected. doi:10.1371/journal.pone.0051290.g001

of citrate synthase or 1  $\mu$ M for luciferase in 100  $\mu$ l of 20 mM HEPES (pH 7.2), 50 mM KCl, 2 mM MgCl<sub>2</sub>, with or without 1.5  $\mu$ M (CS) or 4  $\mu$ M (Luc) of recombinant proteins. Turbidity of the sample mixtures was monitored by measuring absorbance at 320 nm and normalized against the maximum value of the buffer sample.

### Luciferase Assay

In the dual luciferase assay with the XBP1-Luc reporter, ATF4-Luc reporter, or ER-Luc, phRL-TK (Promega) was used as an internal control. HEK293T cells were seeded in 24-well plates, then transfected with plasmid DNA. At 24 h after transfection, cells were lysed for a luciferase assay. Reporter activity was measured using the dual luciferase assay system (Promega) and a luminometer (Berthold). The results are shown as means  $\pm$  SEM from triplicate experiments. Each value is shown as a fold induction normalized to that of mock transfectant (for over-expression) or nontreatment (for drug treatment), the value of which was set at 1.0. In Figure S1B, the value was shown as a Relative activity (RLU).

### RT-PCR

Total RNA was prepared from cells using Isogen reagent (Nippon Gene). A SuperScript<sup>®</sup> First-Strand Synthesis System (Invitrogen) was used to synthesize the cDNA, according to the manufacturer's instructions. cDNA for XBP1 was amplified by 35 cycles of PCR using the following primers: human Xbp1 sense primer, 5'-AGAACCAGGAGTTAAGACAGC-3'; human Xbp1 antisense primer, 5'-AGTCAATACCGCCAGAATCC-3'.

### Cell Lysis and Immunoprecipitation

For immunoprecipitation to detect the interaction with Amy1 or TCR $\alpha$ -GFP, cells were lysed with TNE buffer (10 mM Tris-HCl pH 7.5, 1% NP-40, 150 mM NaCl, 1 mM EDTA) containing a protease inhibitor cocktail (Sigma). For immunoprecipitation to detect the interaction with BiP, the cells were lysed in lysis buffer (20 mM HEPES, pH 7.5, 150 mM NaCl, 1 mM EDTA, 1% Triton-X, 1% glycerol) containing a protease inhibitor cocktail (Sigma) [21]. Anti-HA immunoprecipitation of the protein was performed with protein-G-conjugated sepharose beads (Protein G – Sepharose 4 Fast Flow; GE Healthcare) and anti-HA mAb 12CA5 (Roche) according to standard procedures.

The lysates and immunoprecipitates were denatured in SDS sample buffer (50 mM Tris-HCl, pH 6.8, 2% SDS, 50 mM DTT, 10% glycerol, and 1  $\mu$ g/ml bromophenol blue). SDS-PAGE was performed to resolve the proteins in the lysate. After electrophoresis, the proteins were electrotransferred onto a polyvinylidene fluoride microporous membrane and immunodetection was performed using an anti-HA antibody (HA.11; Covance), anti-KDEL antibody (Stressgen) or anti-Flag antibody (Sigma) according to standard procedures.

## Results

### Clustering of IRE1 $\alpha$ and IRE1 $\beta$ upon ER Stress

First, to elucidate the within-cell dynamics of the mammalian sensors, we fused monomeric green fluorescent protein tags (mEGFP) at the C terminus of IRE1s (Fig. 1A). As shown in Figure 1B, IRE1s were distributed on the ER, and could be merged with ER-localized markers (ER-mKate2). The functionality of GFP-fused IRE1s was confirmed with the induction of XBP1-Luc (IRE1 $\alpha$ ; Fig. S1A), and with the specific attenuation of ER-Luc (IRE1 $\beta$ ; Fig. S1B). Under normal conditions, these GFP-fused IRE1s were diffusely distributed on the ER. However, upon ER stress, both IRE1 $\alpha$  (Li et al., 2010) and IRE1 $\beta$  clustered into discrete foci (Fig. 1C).

Surprisingly, there was a slight time-lag in the clustering between IRE1 $\alpha$  and IRE1 $\beta$ . While IRE1 $\beta$  showed a distinct dot-like structure just 1 h after Tunicamycin (Tun) treatment, the IRE1 $\alpha$  cluster began to appear 2 h after the treatment (Fig. S2). Moreover, the contributing domain to their clustering was different between IRE1 $\alpha$  and IRE1 $\beta$ . While IRE1 $\alpha$  required its luminal function as the homomeric defective mutation (D123P), not kinase defective mutation (K599A), inhibited the clustering, IRE1 $\beta$  seemed to require its kinase activity because K547A (kinase defective) mutant did not show any dot-like structures even under ER stressed conditions (Fig. 1D and 1E). These results imply that the molecular mechanism underlying the foci-formation is distinct in IRE1 $\alpha$  and IRE1 $\beta$ .

### FCS Analysis with IRE1 $\alpha$ and IRE1 $\beta$

Next, to scrutinize the within-cell dynamics of IRE1s more precisely, we employed a dynamic imaging method, fluorescence correlation spectroscopy (FCS). FCS measures the fluorescent molecules within a confocal-detection volume at near single molecule sensitivity, and estimates their molecular number, or diffusion coefficient which reflects the size of the containing complex [38]. In this study, this technique was applied to the GFP-fused IRE1s in living cells (Fig. 2).

In FCS analysis, both of IRE1 $\alpha$  and IRE1 $\beta$  showed fast movement, indicating that the IRE1s are dynamic on the ER membrane. Compared with the case of IRE1 $\alpha$ , the autocorrelation curve of IRE1 $\beta$  significantly and robustly shifted to slower movement upon ER stress (Fig. 2A). Curve fitting analysis of this data (performed by a two-component diffusion model which is best fitted for IRE1s) revealed that the curve shift in IRE1 $\beta$  was caused by the increment in relative content of slow component rather than the decrement in the diffusion coefficient itself (Fig. 2B). Although it is not clear which IRE1 situation or condition is reflected by each component (fast or slow), this data absolutely indicates that compared to IRE1 $\alpha$ , the size of IRE1 $\beta$ -complex is robustly enlarged upon ER stress. As shown in Figure S3, the FCS-detected enlargement of IRE1 $\beta$ -complex did not require kinase activity, because such shift was also detected in the K547A mutant.

What cause the stress-dependent shift of IRE1 $\beta$ ? Generally, a smaller diffusion coefficient indicates that the diffusional mobility of a molecule is decreased. Indeed, the increase in the amount of IRE1 $\beta$  showing smaller diffusion coefficient suggested that the

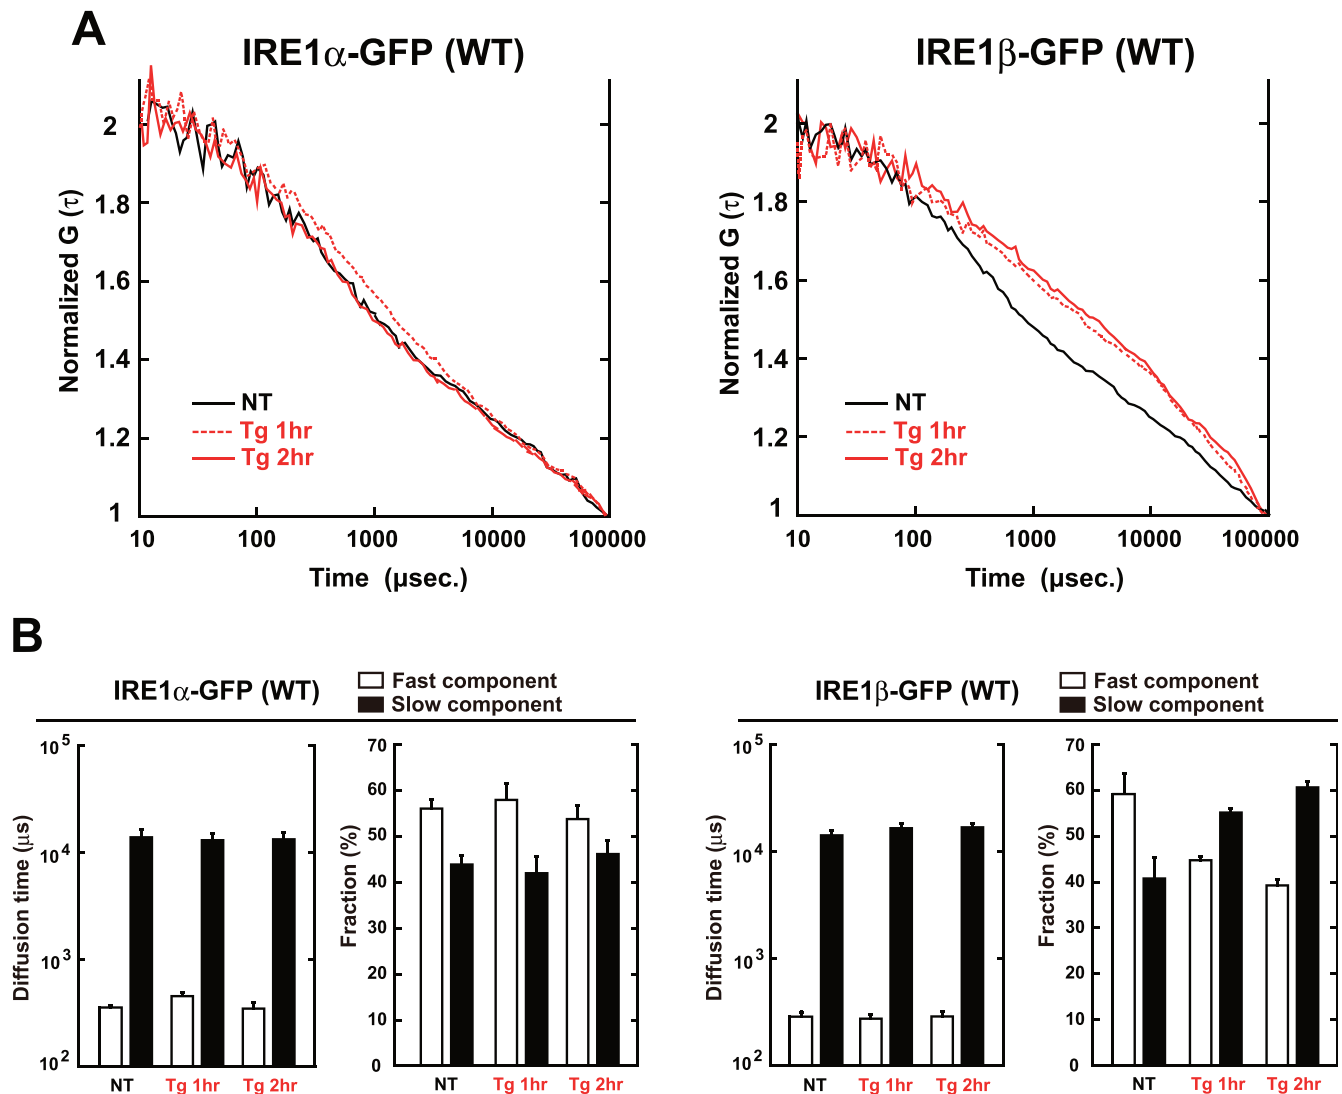

**Figure 2. FCS analysis using IRE1 $\alpha$  and IRE1 $\beta$ .** (A) Normalized  $G(\tau)$  of GFP-fused IRE1s with or without Tg treatment. GFP-fused IRE1s were transfected into HeLa cells and treated with or without thapsigargin (1  $\mu$ M) for the indicated time, after which FCS measurement was performed. (B) Average diffusion time, diffusion coefficients and average fraction of each component of GFP-fused IRE1s. The diffusion time and fraction were calculated by curve fitting (two-component model), and their averaged values are indicated. The values of fast components are indicated as open bars, and the values of slow components are indicated as solid bars. Error bars are the measured mean  $\pm$  SEM ( $n=7$  cells). doi:10.1371/journal.pone.0051290.g002

amount of IRE1 $\beta$  homomeric-association and/or binding with other proteins to make a huge complex (whose diffusion coefficient is  $\sim 0.4 \mu\text{m}^2/\text{s}$ ) would be increased. To identify the IRE1 $\beta$ -associated factors that are not associated with IRE1 $\alpha$ , a series of assays was performed as follows.

#### Association of IRE1 $\beta$ with Model Unfolded Proteins

One hint came from the study of yeast Ire1. Yeast Ire1 has been shown to associate with unfolded proteins directly [14] [39], which may explain the IRE1s' larger size-shift observed in the FCS analysis. To investigate this possibility for mammalian IRE1 $\beta$ , its luminal domain was prepared as MBP-fused fragments (Fig. 3A and 3B), and was subjected to *in vitro* anti-aggregation assay.

Strikingly, the luminal fragments of IRE1 $\beta$  exhibited robust anti-aggregation activity *in vitro*, by inhibiting the aggregation of denatured citrate synthase (Fig. 3C) or luciferase (Fig. 3D). Such activity was also detected in yeast Ire1, but not in mammalian

IRE1 $\alpha$  [21]. This indicates the possibility that, upon ER stress, IRE1 $\beta$  directly associates with unfolded proteins, and forms a larger complex.

Next, to evaluate the association of IRE1 $\beta$  with unfolded proteins in cells, immunoprecipitation was performed using Amy1 or TCR $\alpha$ -GFP as model substrates (Fig. 4). Previous reports indicated that the overexpression of Amy1 induces significant ER stress [40], and TCR $\alpha$ -GFP is known as an ERAD (ER-associated degradation) target [41]. As shown in Fig. 4A and 4B, the overexpression of these proteins caused considerable activation of UPR pathways, with the drastic activation of reporters including the XBP1-Luc (IRE1 $\alpha$ -XBP1 branch; Fig. 4A), and ATF4-Luc (PERK-ATF4 branch; Fig. 4B). Also, the cytosolic splicing of XBP1 mRNA was induced by the overexpression of these proteins (Fig. 4C). The partially lowered splicing of XBP1 mRNA in Figure 4C (compared to Fig. 4A) would be attributed to transfection efficiency.

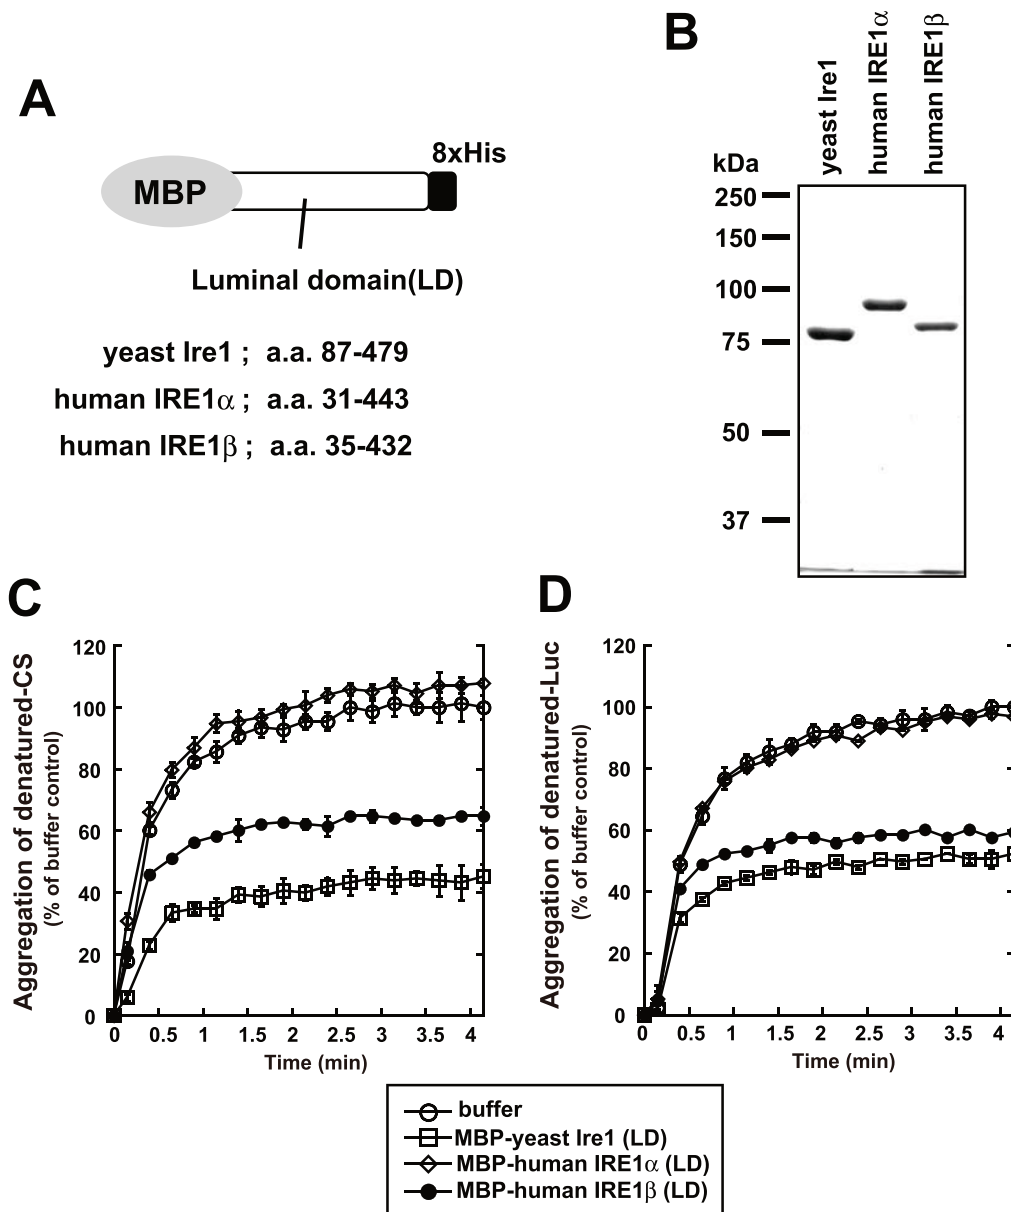

**Figure 3. Anti-aggregation activity of IRE1 $\beta$ .** (A) Schematic of recombinant fragments used in the anti-aggregation assay. (B) SDS-PAGE of recombinant fragments used in the anti-aggregation assay. Bacterially expressed fragments were purified by Ni-NTA, run on 8% SDS-PAGE gels, and stained with Coomassie blue. (C, D) Anti-aggregation assay with the recombinant fragments. At time 0, citrate synthase (C), luciferase (D) in guanidine HCl-denaturing buffer were diluted into assay buffer, with or without each recombinant fragment. Turbidity of the sample mixtures was monitored by measuring absorbance at 320 nm and normalized against the maximum value of the buffer sample. The average and SEM from three reactions are shown.  
doi:10.1371/journal.pone.0051290.g003

In the immunoprecipitation with these model unfolded proteins (Fig. 4D and 4E), the expression of Amy1 or TCR $\alpha$ -GFP was partially attenuated by the expression of IRE1 $\beta$  (wildtype, not K547A mutant), due to the intrinsic RNase activity of IRE1 $\beta$  [36]. As expected, IRE1 $\beta$  showed strong coprecipitation signals, both with Amy1 (Fig. 4D) and TCR $\alpha$ -GFP (Fig. 4E), which was not detected in IRE1 $\alpha$ . Also, since these associations were not inhibited by K547A mutation, kinase activity does not appear to be required for direct association with unfolded proteins.

#### Different Pattern in the Association with BiP

Finally, we evaluated the association of IRE1 $\beta$  with ER chaperone BiP. IRE1 $\alpha$  showed the BiP-association signal under normal conditions, and the signal weakened upon ER stress (Fig. 5A) [21]. However, and surprisingly, IRE1 $\beta$  did not show any BiP-association signal irrespective of ER stress (Fig. 5A). This implies the possibility that the luminal events mediated by IRE1 $\beta$  do not involve BiP association/dissociation.

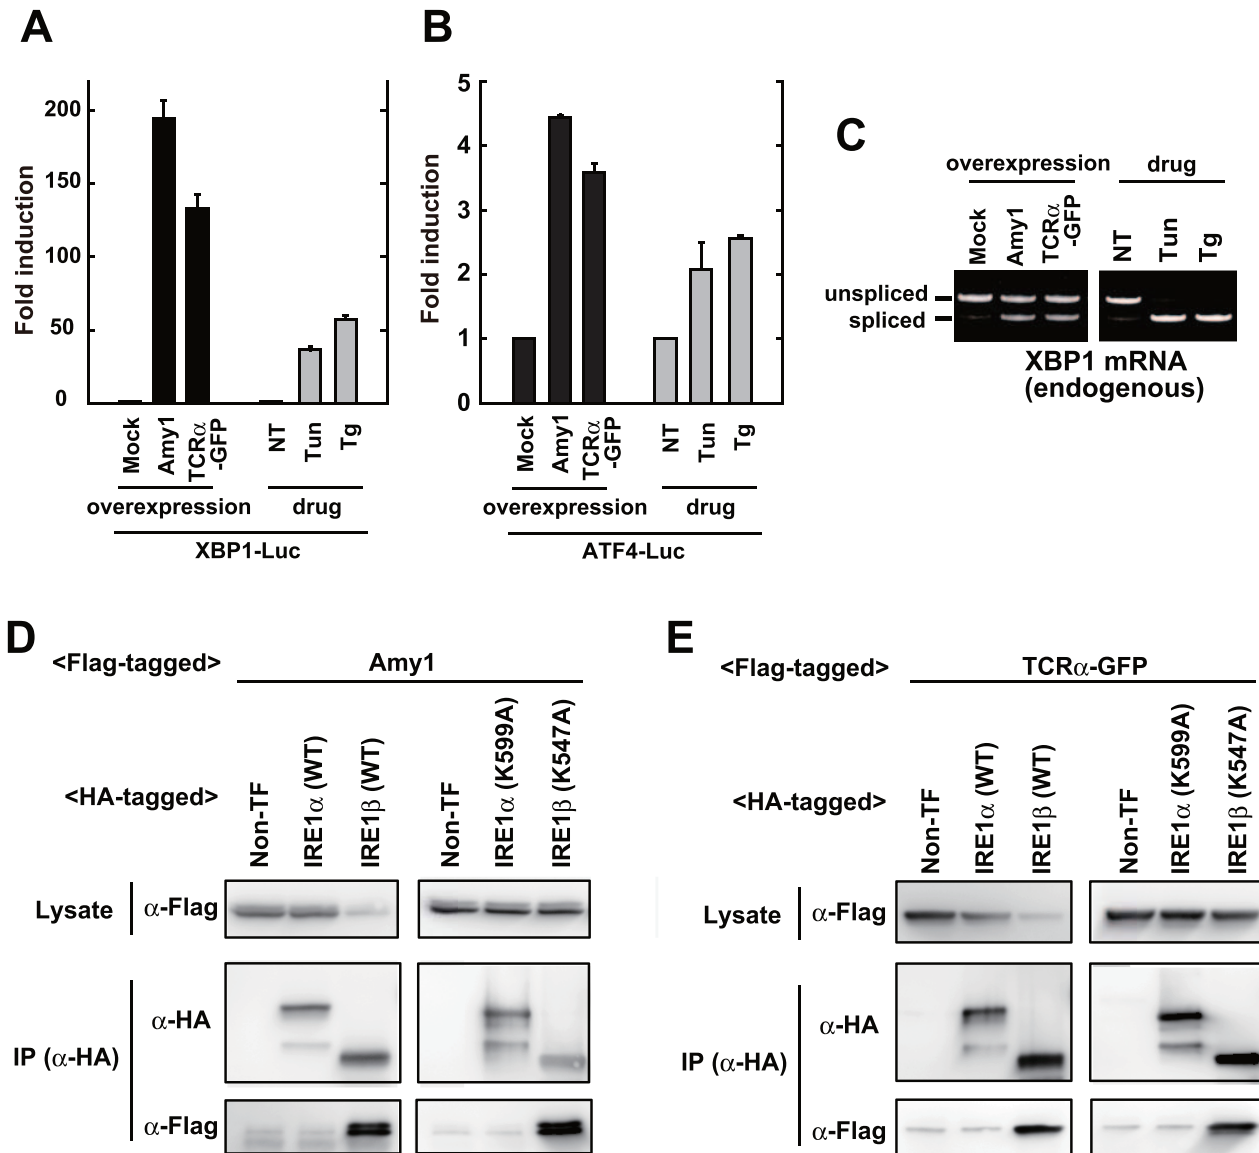

**Figure 4. Association of IRE1 $\beta$  with model proteins.** (A, B) UPR activation by the overexpression of model proteins. The XBP1-Luc reporter (A) or ATF4-Luc reporter (B) were co-transfected with or without Flag-tagged Amy1 overexpressing vector or Flag-tagged TCR $\alpha$ -GFP overexpressing vector into HEK293T cells. Luciferase assays were performed after treatment with or without tunicamycin (2.5  $\mu$ g/ml for 8 h) or thapsigargin (1  $\mu$ M for 8 h). (C) XBP1 splicing elicited by the overexpression of model proteins. Flag-tagged Amy1 overexpressing vector or Flag-tagged TCR $\alpha$ -GFP overexpressing vector was transfected into HEK293T cells. The cells were treated with or without tunicamycin (2.5  $\mu$ g/ml for 2 h) or thapsigargin (1  $\mu$ M for 1 h), and the total RNA was subject to RT-PCR. (D, E) Coprecipitation of IRE1 $\beta$  with model proteins. Flag-tagged Amy1 overexpressing vector (D) or Flag-tagged TCR $\alpha$ -GFP overexpressing vector (E) was co-transfected with or without HA-tagged IRE1 (wild type or mutants) overexpressing vectors into HEK293T cells. Their lysates were used for anti-HA immunoprecipitation. The cell lysates and the anti-HA immunoprecipitates were subjected to Western blot analysis.

doi:10.1371/journal.pone.0051290.g004

## Discussion

In this study, we performed a comparative analysis using two mammalian IRE1s to clarify the luminal event mediated by IRE1 $\beta$ . One finding is that both IRE1 $\alpha$  and IRE1 $\beta$  clustered into discrete foci upon ER stress, though the molecular mechanisms seem to be distinct in IRE1 $\alpha$  and IRE1 $\beta$  (Fig. 1). FCS analysis indicated that IRE1 $\beta$  significantly and robustly shifts to a slower diffusion state upon ER stress, contrary to the IRE1 $\alpha$  (Fig. 2). In agreement with this, the luminal domain of IRE1 $\beta$  showed anti-aggregation activity *in vitro* (Fig. 3), and IRE1 $\beta$  was coprecipitated with model unfolded proteins (Fig. 4). Another striking difference

was found in the BiP-association pattern. While IRE1 $\alpha$  was associated with BiP and dissociated upon ER stress as previously reported [17] [21], any association signals was not detected in IRE1 $\beta$  (Fig. 5A), which might be caused by their sequence differences on the region corresponding to the BiP-binding site of IRE1 $\alpha$  (Fig. 5B) [21]. These results indicate that, differently from IRE1 $\alpha$ , the luminal event mediated by IRE1 $\beta$  directly interacts with unfolded proteins. This study provides the significant information about the luminal event mediated by IRE1 $\beta$ , and also suggests the sensing mechanism of mammalian sensors may involve the specific pathway on signal transition during UPR.

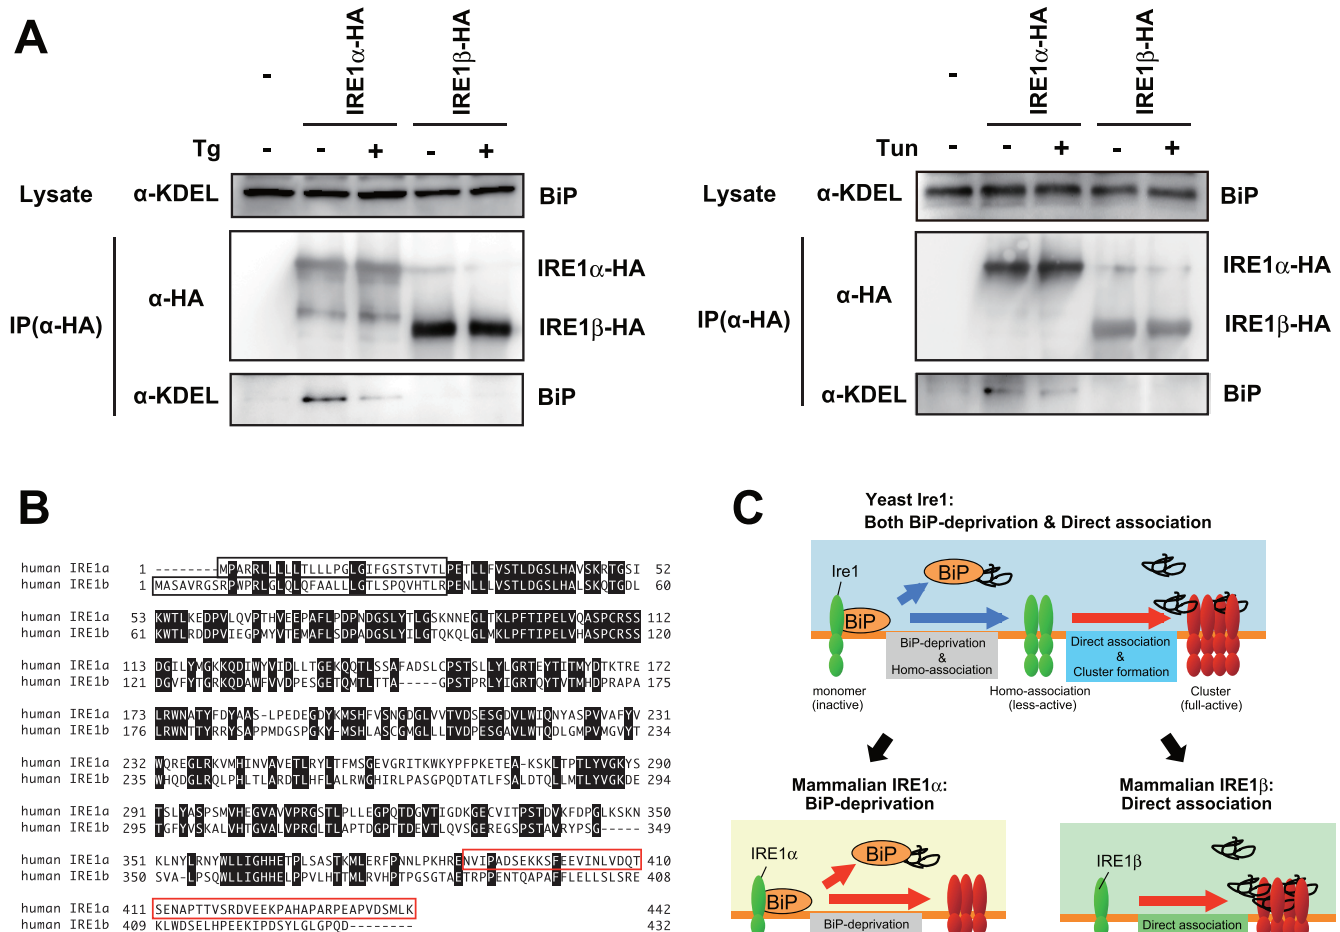

**Figure 5. BiP-association with IRE1 $\alpha$ , not with IRE1 $\beta$ .** (A) BiP-association with IRE1 $\alpha$ , not with IRE1 $\beta$ . HeLa cells transfected with the vector for overexpression of HA-tagged IRE1s (wild type or mutants) were treated with or without 2  $\mu$ M thapsigargin for 30 min (left), or tunicamycin for 60 min (right), and their lysates were used for anti-HA immunoprecipitation. The cell lysates and the anti-HA immunoprecipitates were subjected to Western blot analysis. (B) Amino-acids sequence of luminal domain from IRE1 $\alpha$  and IRE1 $\beta$ . Open black box indicated signal-sequences. Open red box indicated BiP-binding site on IRE1 $\alpha$ . (C) Schematic representation of luminal events mediated by yeast Ire1, mammalian IRE1 $\alpha$ , and mammalian IRE1 $\beta$ . See text for details.  
doi:10.1371/journal.pone.0051290.g005

To visualize the within-cell dynamics of IRE1s, we fused monomeric green fluorescent protein tags (mEGFP) at the C terminus of IRE1s. Monomeric substitution (A206K) may inhibit artificial oligomerization via intermolecular disulfide-bond between GFP. As previous studies [16] [22] inserted GFP-tag between the transmembrane and the cytosolic-effector domain, our C terminus adding of the GFP-tag might have eliminated the activity. However, this possibility was denied by the robust stress response of our GFP constructs (Fig. S1). Because all of these GFP-IRE1 (irrespective of the location of GFP-tag) showed stress-dependent clustering, it seems common activating mechanism to cluster into discrete foci rather than making small oligomer. However, the molecular mechanism behind the clustering seems different between the two IRE1 molecules, as IRE1 $\beta$  showed clearer and faster foci than IRE1 $\alpha$  (Figs. 1 and S2; especially with Tun treatment), and as the kinase activity was only required for IRE1 $\beta$  not for IRE1 $\alpha$  to clustered into discrete foci (Fig. 1).

Importantly, though primitive, this study contains trial experiment with FCS measurement of ER stress sensors. The only report evaluating the molecular diffusion of an UPR-involving

factor is a FRAP (fluorescence recovery after photobleaching) analysis of the ER chaperone, BiP [42]. Molecular diffusion of BiP is decreased upon ER stress, which might be caused by the direct association with unfolded proteins to increase the size of the BiP-containing protein complex. Similarly, the molecular diffusion of IRE1 $\beta$  was decreased upon ER stress in our FCS analysis (Fig. S3), supporting the idea that IRE1 $\beta$  luminal events involve direct association with unfolded proteins under stressed conditions.

The clustering detected by fluorescent microscopy and the shift of autocorrelation curve in FCS analysis would reflect different molecular events, respectively, because FCS is detectable to only mobile molecules with a single molecule sensitivity [38]. Our results in Figure 1 showed that the cytosolic domain is important for the clustering of IRE1 $\beta$ . However, its shifts of autocorrelation curve did not need the cytosolic kinase activity (Fig. S3). Also, while both IRE1 $\alpha$  and IRE1 $\beta$  clustered into foci upon ER stress, the robust shift to a slower diffusion was only detected in IRE1 $\beta$  (Figs. 1, 2 and S2). These observations would be implicated as two possibilities; (i) IRE1s (beta?) possess an ability to assemble without forming visible clusters, (ii) IRE1 $\beta$  is associated with unfolded



proteins in the ER with a mobile state to rapidly recognize the substrates regardless the kinase activity in the cytosol.

The newly found differences between IRE1 $\alpha$  and IRE1 $\beta$  at the activating step may involve the specific pathway on signal transition during UPR. It is thought that while IRE1 $\alpha$  is transiently activated and attenuated soon to perform survival effect for cells [22] [27], the activation of IRE1 $\beta$  is continual to elicit apoptotic cell death [25], as implied from the sustained repression of MTP mRNA [43] and chronic change in intestinal lipid absorption [44]. Such difference in their activating timing or continuousness might contribute to their different downstream effects. Also, the substrates sensed by IRE1 $\alpha$  and IRE1 $\beta$  might be different each other, resulting from their intrinsic sensing mechanism (Fig. 5C). The unfolded or malformed status that elicits the deprivation BiP of IRE1 $\alpha$  could differ from that directly binds to IRE1 $\beta$ , and the difference would determine which IRE1 molecule should be activated. As shown in Figure 5B, the amino acid-sequence between IRE1 $\alpha$  and IRE1 $\beta$  is not so conserved on their luminal domain, especially in the adjacent region to the transmembrane domain that is the BiP-binding site in case of IRE1 $\alpha$  [21]. This might be one reason behind the different activating step between IRE1 $\alpha$  and IRE1 $\beta$ . Also, such selectivity might be one reason why the two sequential steps in yeast Ire1, the BiP-deprivation step and the direct association step, are evolutionally divided into each IRE1 molecules in mammal (Fig. 5C).

Still, some questions remain to be solved. One question is how IRE1 $\beta$  forms homo-associates or dot-like assemblies. Previous structure analysis reported that yeast Ire1 has multiple homomeric interfaces in its lumen and forms polymeric oligomers [45]. On the contrary, the luminal domain of mammalian IRE1 $\alpha$  has a single interface and forms dimers or small oligomers [46]. At this time, we have no clear answer to whether the luminal domain of IRE1 $\beta$  forms dimers (small oligomers) or robust high-molecular oligomers, because there are no structural information about the luminal domain of IRE1 $\beta$ , and because the amino-acid sequence is not so conserved on their luminal domain (Fig. 5B). We could not estimate the oligomer size of the MBP-fused IRE1 $\beta$  (Fig. 2), due to several technical difficulties. Alternatively, the cytosolic domain which contains dimer-forming interface in IRE1 $\alpha$  [47] might contribute to the dot like assemblies also in IRE1 $\beta$ , as the cytosolic kinase activity was important for the clustering of IRE1 $\beta$  (Fig. 1). Another question is how the stress-dependent clustering of IRE1 $\beta$  is regulated. Although an association with BiP was hardly detected in our immunoprecipitation (Fig. 5A), we cannot exclude the possibility that BiP is involved in the clustering of IRE1 $\beta$  by a different manner than with IRE1 $\alpha$ , as it has been reported that IRE1 $\beta$  is co-immunoprecipitated with BiP from extracts of mice stomach mucosa (a tissue rich in IRE1 $\beta$ ) [26]. Alternatively, there may be other regulating factors. Recent reports on IRE1 $\alpha$  describe various regulating factors associated with the cytosolic domain, including BI-1 [48] or RACK1 [49–50]. Such factors might exist

to regulate the clustering or activation of IRE1 $\beta$ . Also, it is still unknown how the luminal events (clustering, or direct association with unfolded proteins) links to the cytosolic activation (or phosphorylation). Does direct association function as a regulating step for the activation of IRE1 $\beta$ ? Moreover, we could not examine the activity of IRE1 $\beta$  in detail. Only a small number of targets specific to IRE1 $\beta$  have been reported, and a system for precise evaluation of their changes has not been developed. To overcome these problems, and to fully elucidate the sensing mechanism of IRE1 $\beta$ , further research is needed.

## Supporting Information

**Figure S1 Functionality of GFP-fused IRE1s.** (A) Functionality of GFP-fused IRE1 $\alpha$ . The IRE1 $\alpha$  expression vector (left) or IRE1 $\alpha$ -GFP expression vector (right) were co-transfected with the XBP1-Luc reporter into IRE1 $\alpha$   $-/-$  MEFs. Luciferase assays were performed after treatment with or without tunicamycin (2.5  $\mu$ g/ml for 8 h) or thapsigargin (1  $\mu$ M for 8 h). (B) Functionality of GFP-fused IRE1 $\beta$ . The IRE1 $\alpha$ -GFP (wildtype or K599A) expression vector, or IRE1 $\beta$ -GFP (wildtype or K547A) expression vector were co-transfected with the ER-luciferase reporter (left) or cytosolic-luciferase reporter (right) into HeLa cells, then luciferase assays were performed.

(PDF)

**Figure S2 Timing of cluster formation of IRE1 $\alpha$  and IRE1 $\beta$  upon tunicamycin treatment.** GFP-fused IRE1s were transfected into HeLa cells, and treated with tunicamycin (2.5  $\mu$ g/ml) for the indicated time. Fluorescent images were collected from untreated, 1-h treated, or 2-h treated cells.

(PDF)

**Figure S3 FCS analysis with mutants of IRE1 $\alpha$  or IRE1 $\beta$ .** GFP-fused IRE1s were transfected into HeLa cells and treated with or without thapsigargin (1  $\mu$ M) for the indicated time, after which FCS measurement was performed. Normalized G( $\tau$ ) was shown.

(PDF)

## Acknowledgments

We thank Dr. Ron R. Kopito (Stanford University) for the cDNA of TCR $\alpha$ -GFP, and Dr. A. Hosoda (Tokushima University) for the cDNA of mouse Amy1. We also thank R. Akai and M. Tokuda for technical assistance. We are grateful for the support of BSF's Research Resources Center for DNA sequencing analysis.

## Author Contributions

Conceived and designed the experiments: MK TI. Performed the experiments: DO AK. Analyzed the data: DO AK. Contributed reagents/materials/analysis tools: DO AK MK TI. Wrote the paper: DO AK.

## References

- Ron D, Walter P (2007) Signal integration in the endoplasmic reticulum unfolded protein response. *Nat Rev Mol Cell Biol* 8: 519–529.
- Cox JS, Shamu CE, Walter P (1993) Transcriptional induction of genes encoding endoplasmic reticulum resident proteins requires a transmembrane protein kinase. *Cell* 73: 1197–1206.
- Mori K, Ma W, Gething MJ, Sambrook J (1993) A transmembrane protein with a cdc2+/CDC28-related kinase activity is required for signaling from the ER to the nucleus. *Cell* 74: 743–756.
- Harding HP, Zhang Y, Ron D (1999) Protein translation and folding are coupled by an endoplasmic-reticulum-resident kinase. *Nature* 397: 271–274.
- Yoshida H, Haze K, Yanagi H, Yura T, Mori K (1998) Identification of the cis-acting endoplasmic reticulum stress response element responsible for transcriptional induction of mammalian glucose-regulated proteins. Involvement of basic leucine zipper transcription factors. *J Biol Chem* 273: 33741–33749.
- Yoshida H, Matsui T, Yamamoto A, Okada T, Mori K (2001) XBP1 mRNA is induced by ATF6 and spliced by IRE1 in response to ER stress to produce a highly active transcription factor. *Cell* 107: 881–891.
- Callón M, Zeng H, Urano F, Till JH, Hubbard SR, et al. (2002) IRE1 couples endoplasmic reticulum load to secretory capacity by processing the XBP1 mRNA. *Nature* 415: 92–96.
- Lee AH, Iwakoshi NN, Glimcher LH (2003) XBP-1 regulates a subset of endoplasmic reticulum resident chaperone genes in the unfolded protein response. *Mol Cell Biol* 23: 7448–7459.
- Okamura K, Kimata Y, Higashio H, Tsuru A, Kohno K (2000) Dissociation of Kar2p/BiP from an ER sensory molecule, Ire1p, triggers the unfolded protein response in yeast. *Biochem Biophys Res Commun* 279: 445–450.

10. Kimata Y, Kimata YI, Shimizu Y, Abe H, Farcasanu IC, et al. (2003) Genetic evidence for a role of BiP/Kar2 that regulates Ire1 in response to accumulation of unfolded proteins. *Mol Biol Cell* 14: 2559–2569.
11. Kimata Y, Oikawa D, Shimizu Y, Ishiwata-Kimata Y, Kohno K (2004) A role for BiP as an adjutor for the endoplasmic reticulum stress-sensing protein Ire1. *J Cell Biol* 167: 445–456.
12. Pincus D, Chevalier MW, Aragón T, van Anken E, Vidal SE, et al. (2010) BiP binding to the ER-stress sensor Ire1 tunes the homeostatic behavior of the unfolded protein response. *PLoS Biol* 8: e1000415.
13. Oikawa D, Kimata Y, Kohno K (2007) Self-association and BiP dissociation are not sufficient for activation of the ER stress sensor Ire1. *J Cell Sci* 120: 1681–1688.
14. Kimata Y, Ishiwata-Kimata Y, Ito T, Hirata A, Suzuki T, et al. (2007) Two regulatory steps of ER-stress sensor Ire1 involving its cluster formation and interaction with unfolded proteins. *J Cell Biol* 179: 75–86.
15. Korenykh AV, Egea PF, Korostelev AA, Finer-Moore J, Zhang C, et al. (2009) The unfolded protein response signals through high-order assembly of Ire1. *Nature* 457: 687–93.
16. Aragón T, van Anken E, Pincus D, Serafimova IM, Korenykh AV, et al. (2009) Messenger RNA targeting to endoplasmic reticulum stress signalling sites. *Nature* 457: 736–744.
17. Bertolotti A, Zhang Y, Hendershot LM, Harding HP, Ron D (2000) Dynamic interaction of BiP and ER stress transducers in the unfolded-protein response. *Nat Cell Biol* 2: 326–332.
18. Liu CY, Schroder M, Kaufman RJ (2000) Ligand-independent dimerization activates the stress response kinases IRE1 and PERK in the lumen of the endoplasmic reticulum. *J Biol Chem* 275: 24881–24885.
19. Liu CY, Wong HN, Schaurte JA, Kaufman RJ (2002) The protein kinase/endoribonuclease IRE1 $\alpha$  that signals the unfolded protein response has a luminal N-terminal ligand-independent dimerization domain. *J Biol Chem* 277: 18346–18356.
20. Liu CY, Xu Z, Kaufman RJ (2003) Structure and intermolecular interactions of the luminal dimerization domain of human IRE1 $\alpha$ . *J Biol Chem* 278: 17680–17687.
21. Oikawa D, Kimata Y, Kohno K, Iwakaki T (2009) Activation of mammalian IRE1 $\alpha$  upon ER stress depends on dissociation of BiP rather than on direct interaction with unfolded proteins. *Exp Cell Res* 315: 2496–2504.
22. Li H, Korenykh AV, Behrman SL, Walter P (2010) Mammalian endoplasmic reticulum stress sensor IRE1 signals by dynamic clustering. *Proc Natl Acad Sci USA* 107: 16113–16118.
23. Tirasophon W, Welihinda AA, Kaufman RJ (1998) A stress response pathway from the endoplasmic reticulum to the nucleus requires a novel bifunctional protein kinase/endoribonuclease (Ire1p) in mammalian cells. *Genes Dev* 12: 1812–1824.
24. Wang XZ, Harding HP, Zhang Y, Jolicoeur EM, Kuroda M, et al. (1998) Cloning of mammalian Ire1 reveals diversity in the ER stress responses. *EMBO J* 17: 5708–5717.
25. Iwakaki T, Hosoda A, Okuda T, Kamigori Y, Nomura-Furuwatari C, et al. (2001) Translational control by the ER transmembrane kinase/ribonuclease IRE1 under ER stress. *Nat Cell Biol* 3: 158–164.
26. Bertolotti A, Wang X, Novoa I, Jungreis R, Schlessinger K, et al. (2001) Increased sensitivity to dextran sodium sulfate colitis in IRE1 $\beta$ -deficient mice. *J Clin Invest* 107: 585–593.
27. Lin JH, Li H, Yasumura D, Cohen HR, Zhang C, et al. (2007) IRE1 signaling affects cell fate during the unfolded protein response. *Science* 318: 944–949.
28. Lipson KL, Ghosh R, Urano F (2008) The role of IRE1 $\alpha$  in the degradation of insulin mRNA in pancreatic  $\beta$ -cells. *PLoS One* 3: e1648.
29. Hollien J, Lin JH, Li H, Stevens N, Walter P, et al. (2009) Regulated Ire1-dependent decay of messenger RNAs in mammalian cells. *J Cell Biol* 186: 323–331.
30. Oikawa D, Tokuda M, Hosoda A, Iwakaki T (2010) Identification of a consensus element recognized and cleaved by IRE1 $\alpha$ . *Nucleic Acids Res* 38: 6265–6273.
31. Imagawa Y, Hosoda A, Sasaka S, Tsuru A, Kohno K (2008) RNase domains determine the functional difference between IRE1 $\alpha$  and IRE1 $\beta$ . *FEBS Lett* 582: 656–660.
32. Iqbal J, Dai K, Seimon T, Jungreis R, Oyadomari M, et al. (2008) IRE1 $\beta$  inhibits chylomicron production by selectively degrading MTP mRNA. *Cell Metab* 7: 445–455.
33. Oikawa D, Kimata Y, Takeuchi M, Kohno K (2005) An essential dimer-forming subregion of the endoplasmic reticulum stress sensor Ire1. *Biochem J* 391: 135–142.
34. Iwakaki T, Akai R (2006) Analysis of the XBP1 splicing mechanism using endoplasmic reticulum stress-indicators. *Biochem Biophys Res Commun* 350: 709–715.
35. Lu PD, Harding HP, Ron D (2004) Translation reinitiation at alternative open reading frames regulates gene expression in an integrated stress response. *J Cell Biol* 167: 27–33.
36. Nakamura D, Tsuru A, Ikegami K, Imagawa Y, Fujimoto N, et al. (2011) Mammalian ER stress sensor IRE1 $\beta$  specifically down-regulates the synthesis of secretory pathway proteins. *FEBS Lett* 585: 133–8.
37. Kitamura A, Kubota H, Pack CG, Matsumoto G, Hirayama S, et al. (2006) Cytosolic chaperonin prevents polyglutamine toxicity with altering the aggregation state. *Nat Cell Biol* 8: 1163–1169.
38. Rigler R, Mets U, Widengren J, Kask P (1993) Fluorescence correlation spectroscopy with high count rate and low background: analysis of translational diffusion. *Eur Biophys J* 22: 169–175.
39. Gardner BM, Walter P (2011) Unfolded proteins are Ire1-activating ligands that directly induce the unfolded protein response. *Science* 333: 1891–1894.
40. Hosoda A, Tokuda M, Akai R, Kohno K, Iwakaki T (2009) Positive contribution of ERdj5/JPD1 to endoplasmic reticulum protein quality control in the salivary gland. *Biochem J* 425: 117–125.
41. Helen Yu, Kopito RR (1999) The Role of Multiubiquitination in Dislocation and Degradation of the  $\alpha$  Subunit of the T Cell Antigen Receptor. *J Biol Chem* 274: 36852–36858.
42. Lai CW, Aronson DE, Snapp EL (2010) BiP availability distinguishes states of homeostasis and stress in the endoplasmic reticulum of living cells. *Mol Biol Cell* 21: 1909–1921.
43. Dai K, Khatun I, Hussain MM (2010) NR2F1 and IRE1 $\beta$  suppress microsomal triglyceride transfer protein expression and lipoprotein assembly in undifferentiated intestinal epithelial cells. *Arterioscler Thromb Vasc Biol* 30: 568–574.
44. Iqbal J, Queiroz J, Li Y, Jiang XC, Ron D, et al. (2012) Increased Intestinal Lipid Absorption Caused by Ire1 $\beta$  Deficiency Contributes to Hyperlipidemia and Atherosclerosis in Apolipoprotein E-Deficient Mice. *Circ Res* 110: 1575–1584.
45. Credle JJ, Finer-Moore JS, Papa FR, Stroud RM, Walter P (2005) On the mechanism of sensing unfolded protein in the endoplasmic reticulum. *Proc Natl Acad Sci USA* 102: 18773–18784.
46. Zhou J, Liu CY, Back SH, Clark RL, Peisach D, et al. (2006) The crystal structure of human IRE1 luminal domain reveals a conserved dimerization interface required for activation of the unfolded protein response. *Proc Natl Acad Sci USA* 103: 14343–14348.
47. Ali MM, Bagratuni T, Davenport EL, Nowak PR, Silva-Santesteban MC, et al. (2011) Structure of the Ire1 autophosphorylation complex and implications for the unfolded protein response. *EMBO J* 30: 894–905.
48. Lisbona F, Rojas-Rivera D, Thielen P, Zamorano S, Todd D, et al. (2009) BAX inhibitor-1 is a negative regulator of the ER stress sensor IRE1 $\alpha$ . *Mol Cell* 33: 679–691.
49. Qiu Y, Mao T, Zhang Y, Shao M, You J, et al. (2010) A crucial role for RACK1 in the regulation of glucose-stimulated IRE1 $\alpha$  activation in pancreatic  $\beta$ -cells. *Sci Signal* 3: ra7.
50. Woehlbiel U, Hetz C (2011) Modulating stress responses by the UPosome: a matter of life and death. *Trends Biochem Sci* 36: 329–337.
